# Supplementary material
Source: PubMed Central journal article supplement (PMC3023847)
Supplement: neo1301_0072SD1.pdf [file neo1301_0072SD1.pdf]

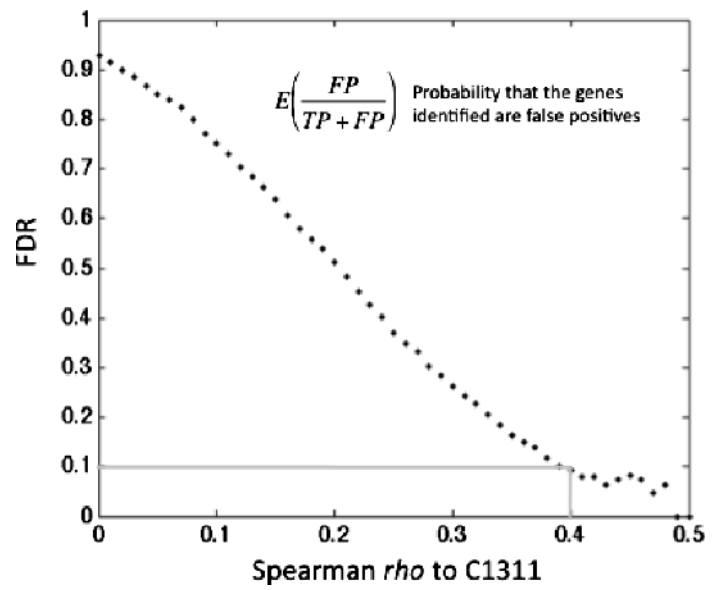

A

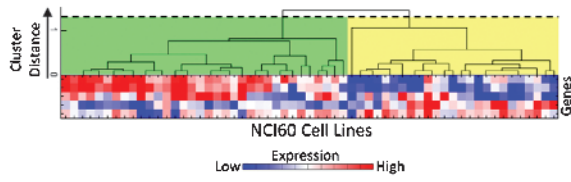

B

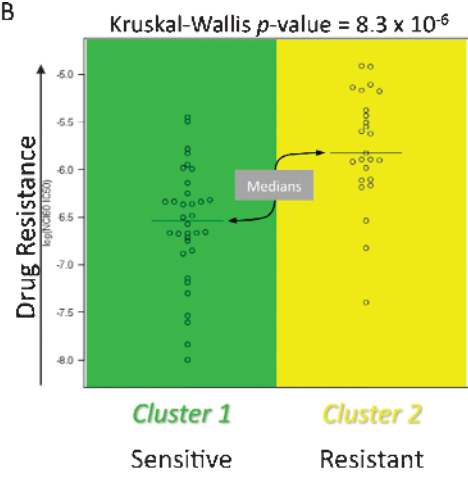

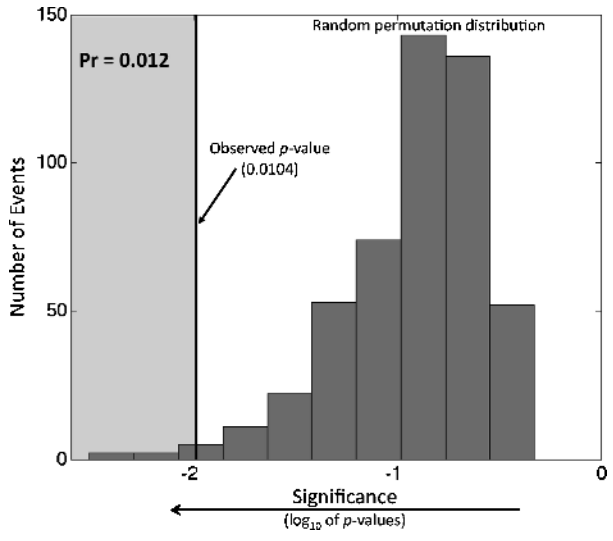

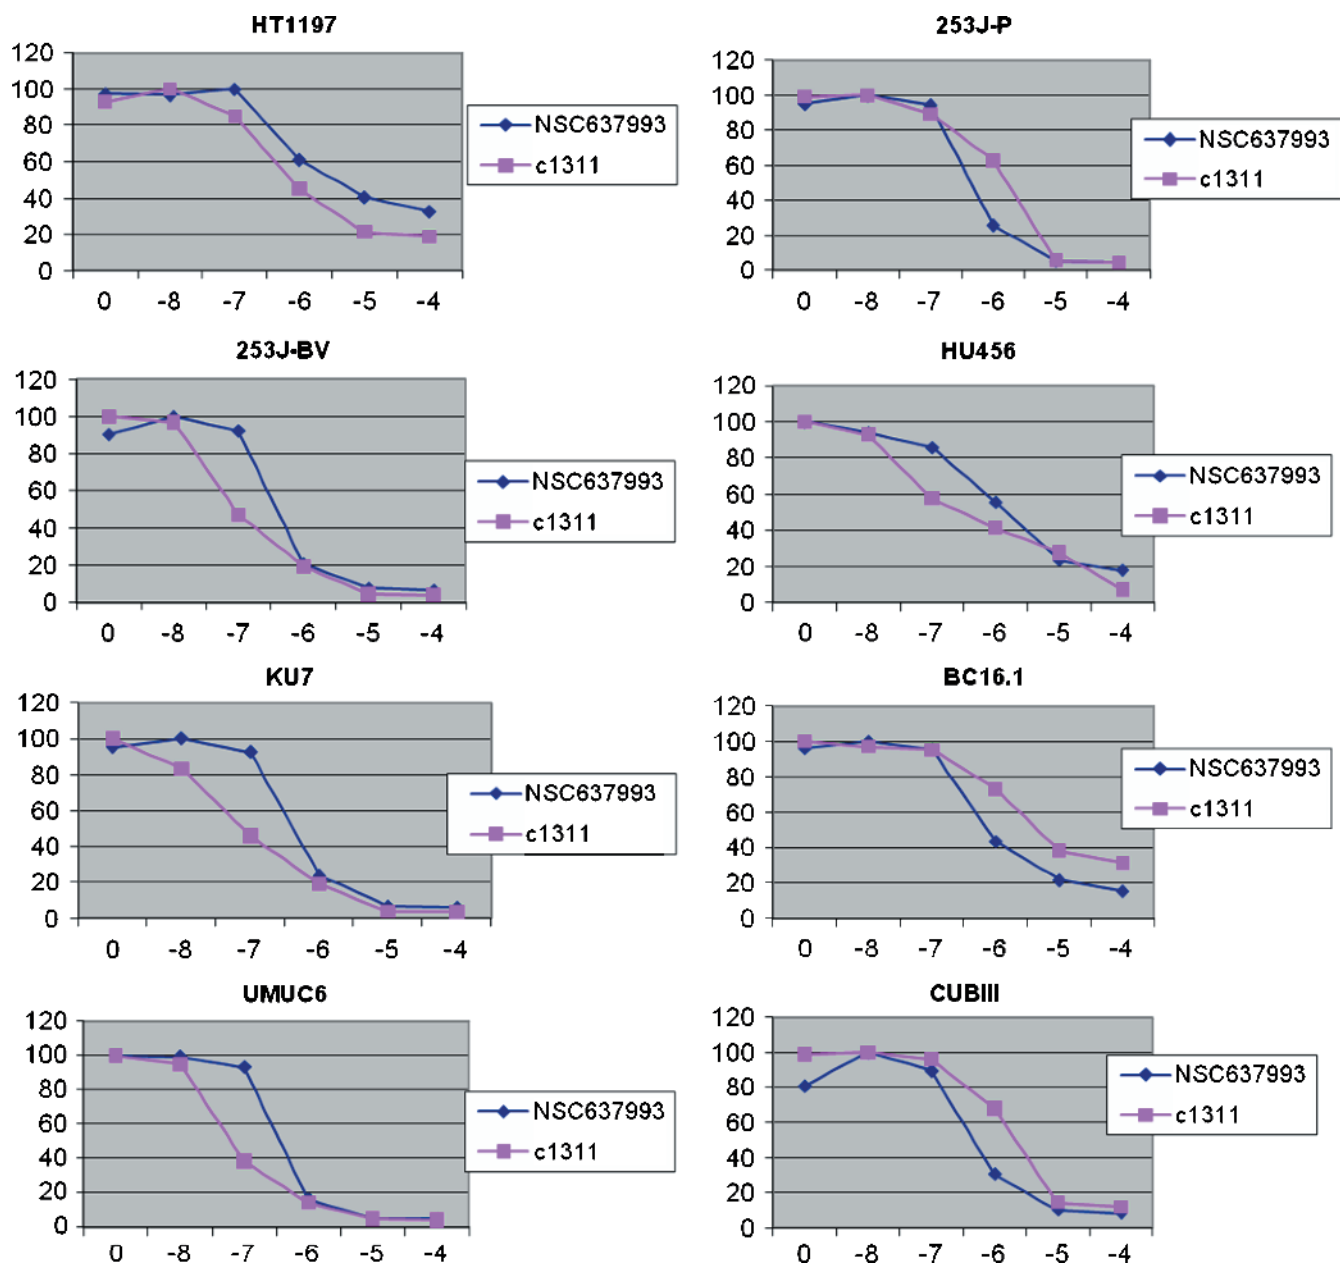

**Figure W1.** C1311 and NSC-637993 dose-response curves. Cells were exposed to RPMI 1640/10% FBS medium with diluted NSC-637993 or C1311 at concentrations of 0 (control), 0.01, 0.1, 1, 10, and 100  $\mu$ M; after 72 hours of culture, cell counts were assayed. Each concentration of drug was tested on six replicate wells in more than 4 individual experiments. Data presented below for each of the cell lines show percent of maximal cell growth (y axis) per drug, averaged across the four replicates, plotted against the log<sub>10</sub> treatment dose. These drug-response curves were used in Spline regression to estimate the IC<sub>50</sub> values presented in Figure 1A and Table W1 as described in Materials and Methods.

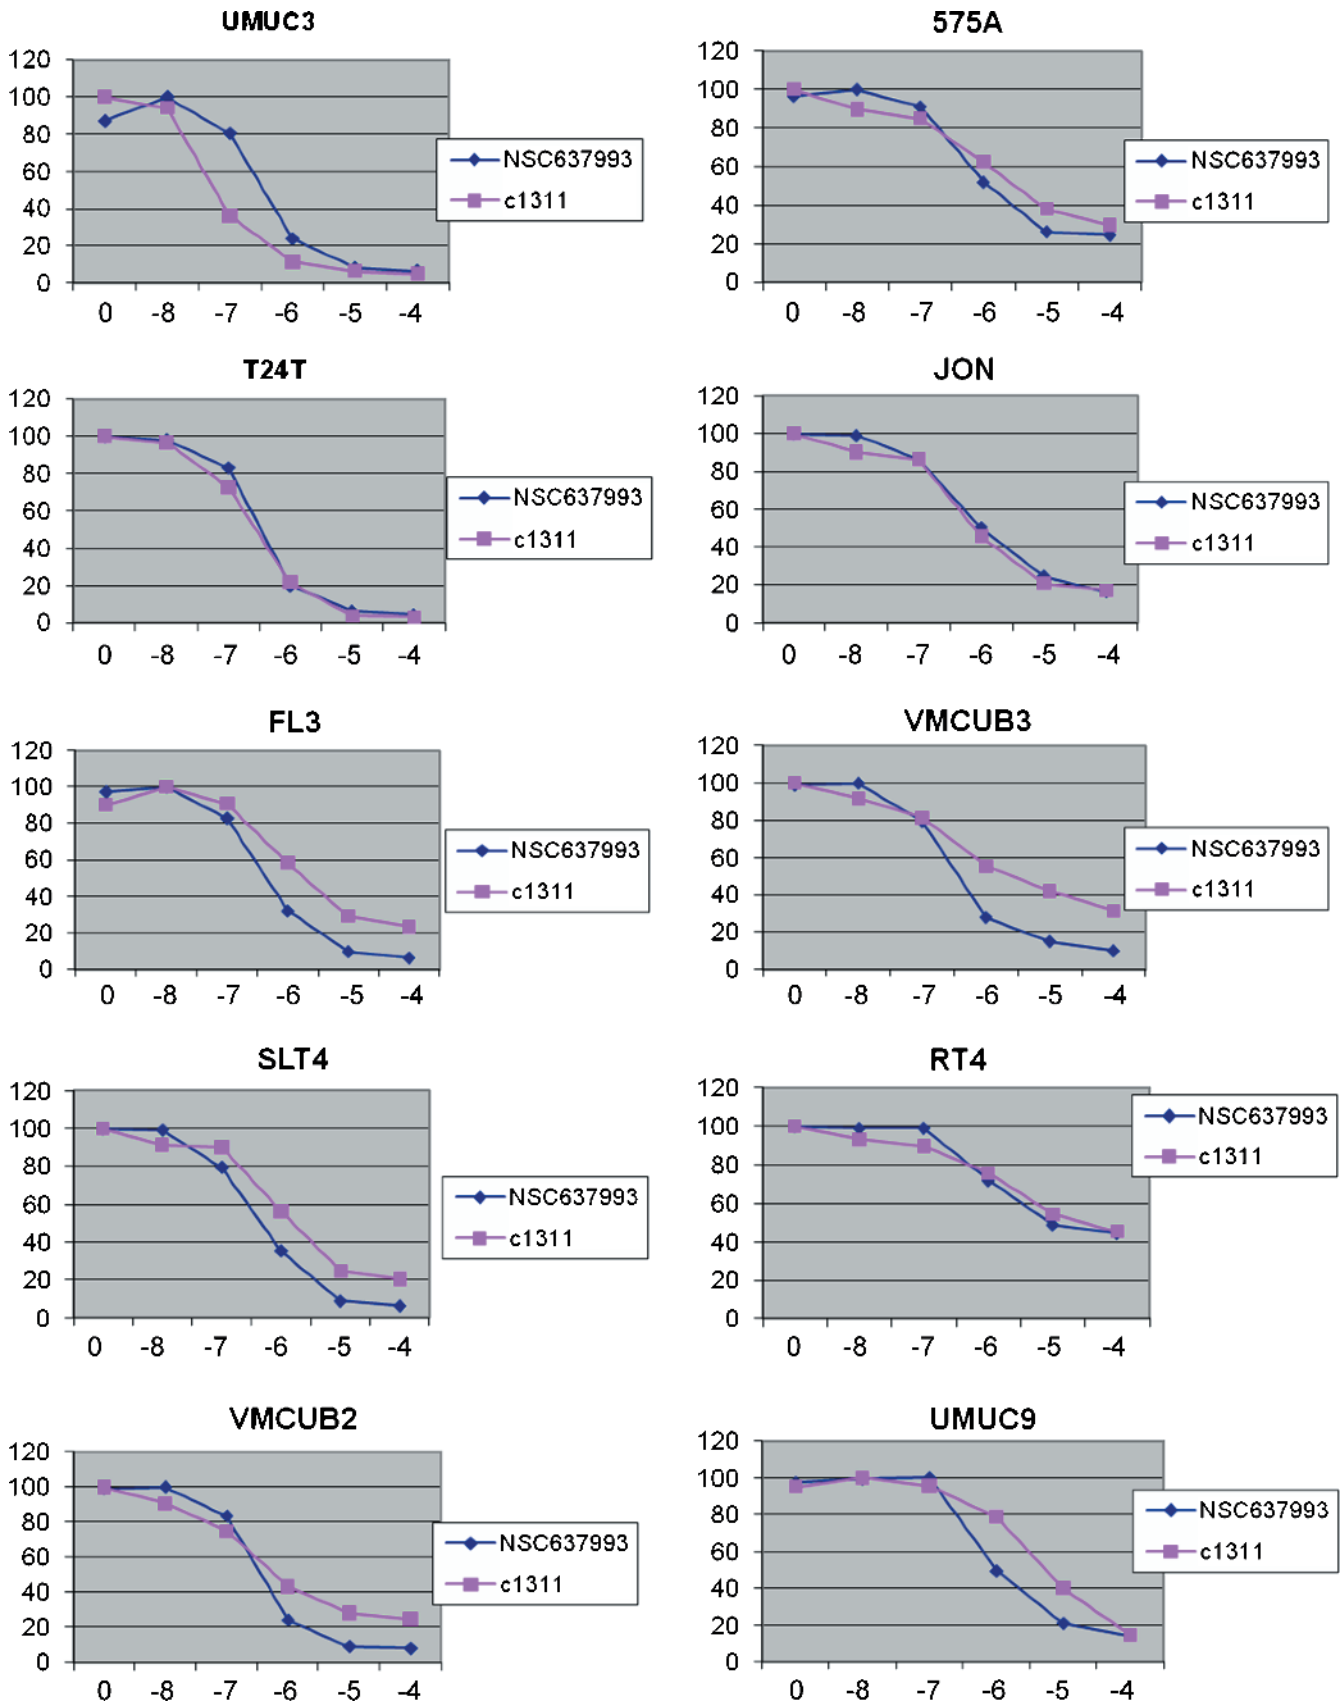

Figure W1. (continued).

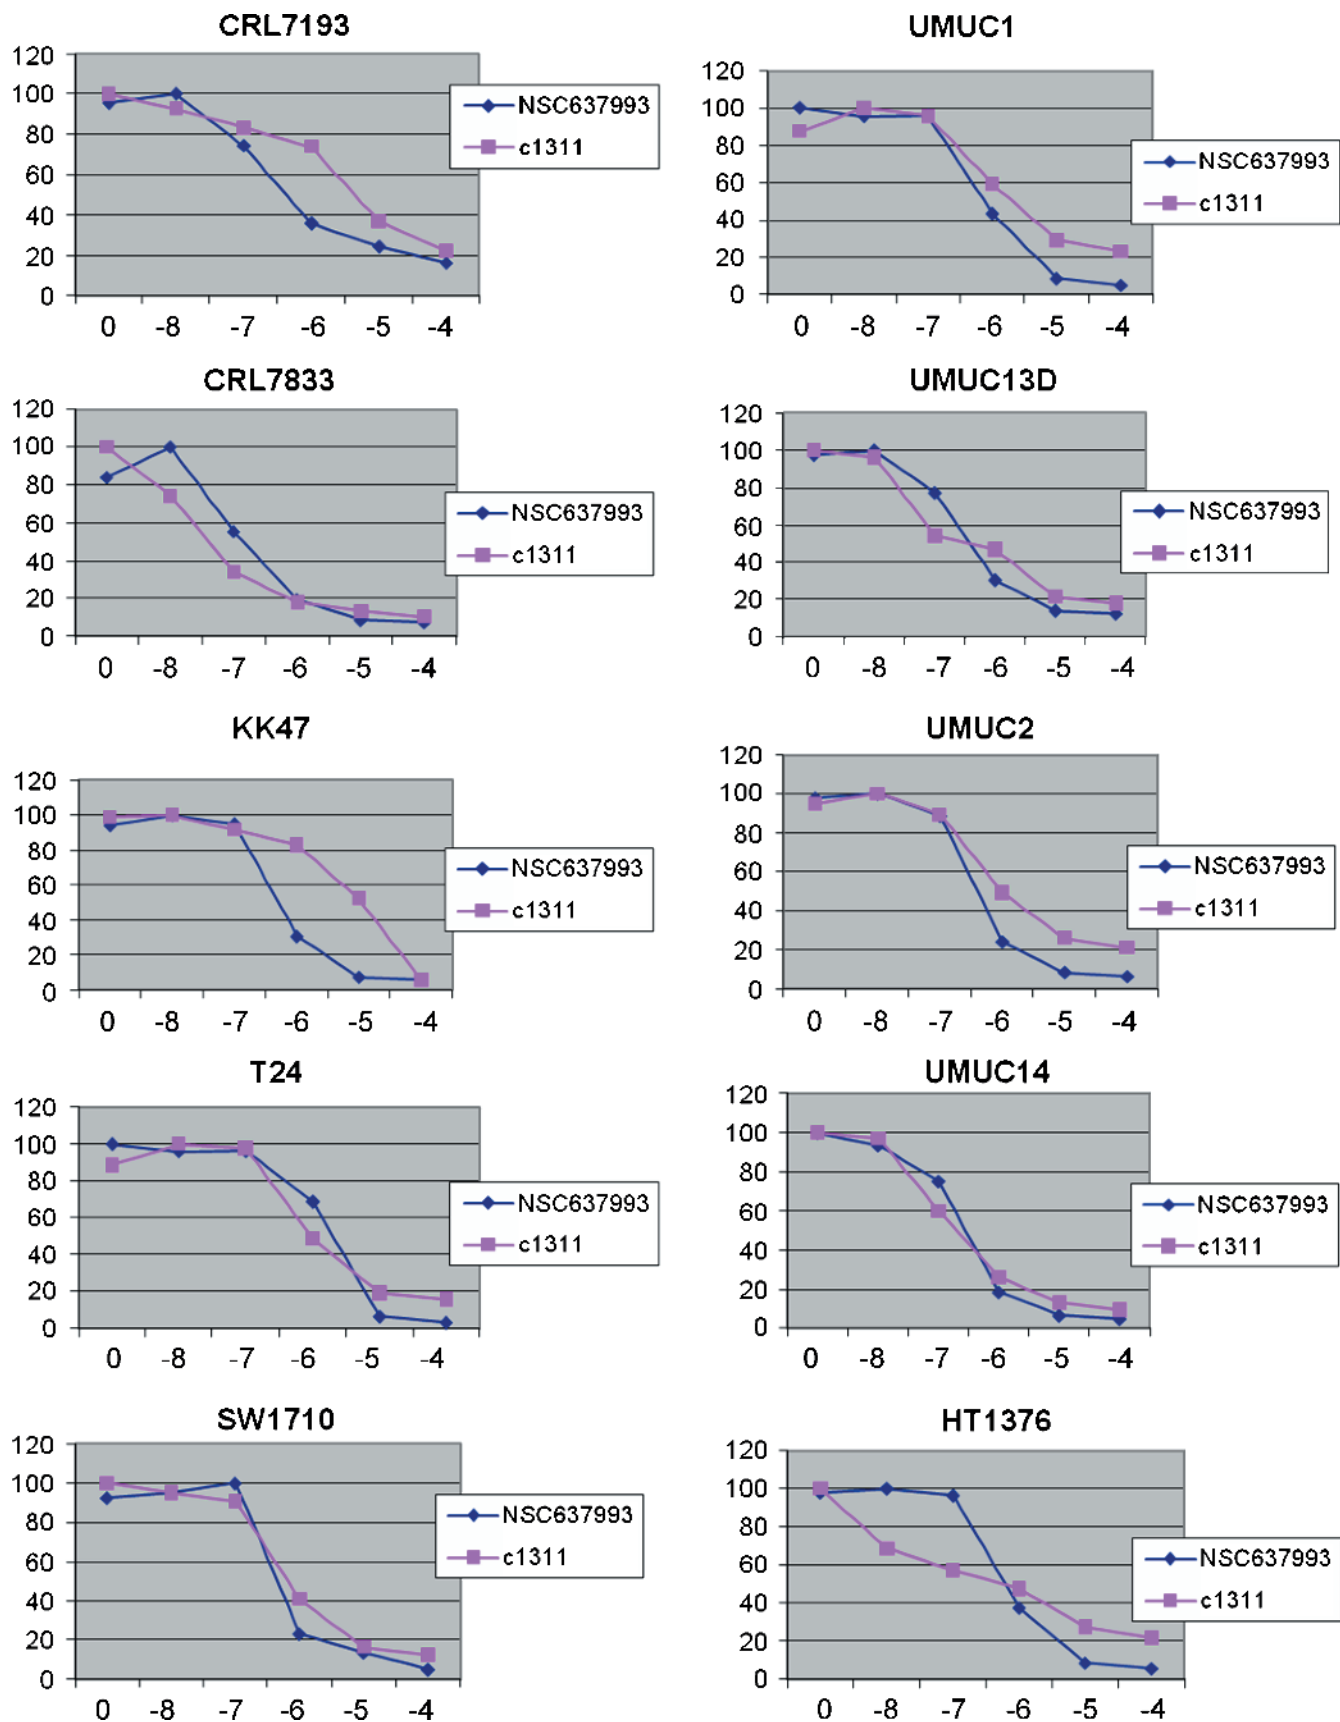

Figure W1. (continued).

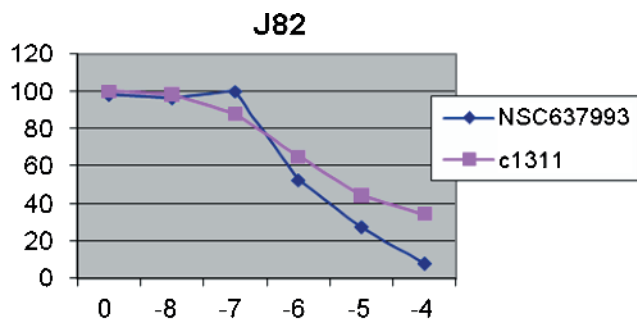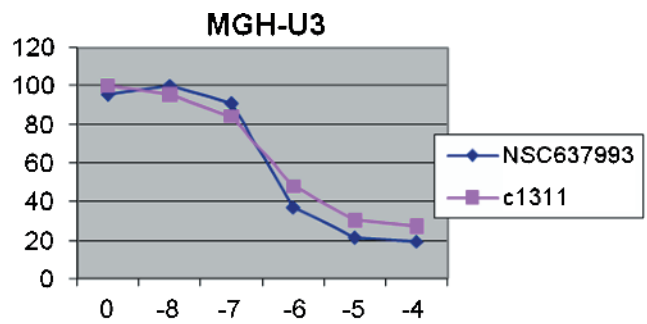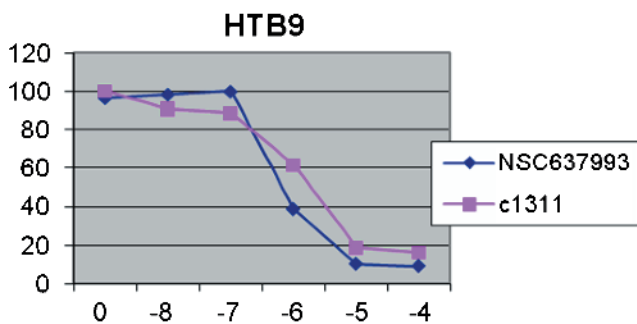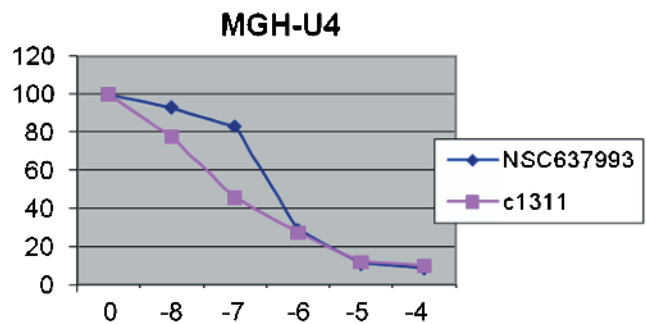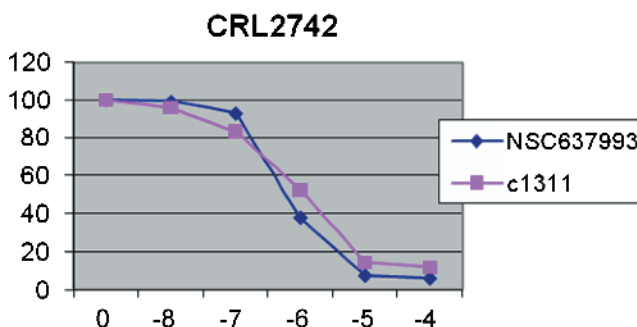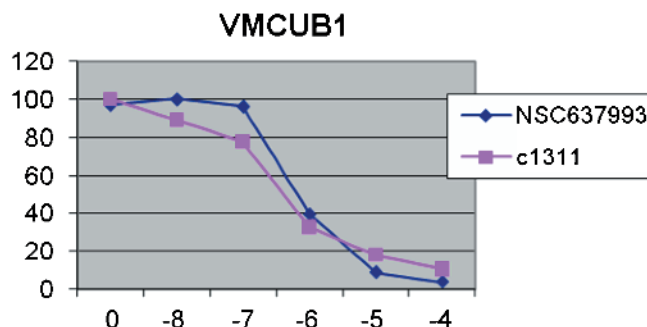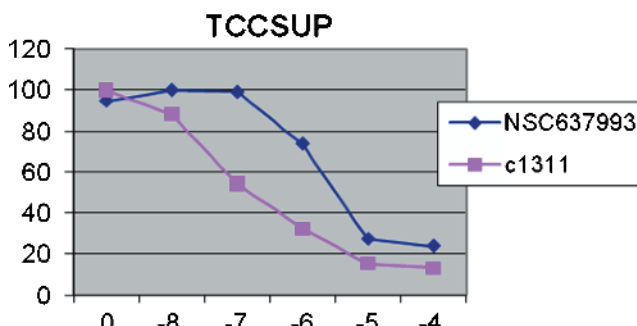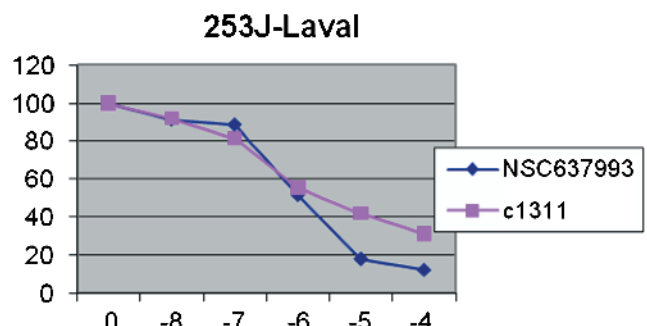

Figure W1. (continued).

**Table W1.** Log<sub>10</sub> IC<sub>50</sub> Values for the BLA-40 Cell Line Panel.

| Cell Line* | C1311  | NSC-637993 <sup>†</sup> |
|------------|--------|-------------------------|
| CRL7833    | -7.173 | -6.574                  |
| KU7        | -6.954 | -6.378                  |
| UMUC3      | -6.951 | -6.337                  |
| UMUC6      | -6.923 | -6.281                  |
| MGH-U4     | -6.874 | -6.187                  |
| 253J-BV    | -6.836 | -6.342                  |
| TCCSUP     | -6.682 | -5.193                  |
| SCaBER     | -6.671 | ‡                       |
| UMUC14     | -6.651 | -6.641                  |
| T24T       | -6.622 | -6.604                  |
| HU456      | -6.476 | -5.675                  |
| UMUC3-E    | -6.454 | ‡                       |
| VMCUB1     | -6.383 | -6.071                  |
| UMUC13D    | -6.353 | -6.361                  |
| VMCUB2     | -6.197 | -6.433                  |
| HT1376     | -6.137 | -5.959                  |
| CRL2169    | -6.107 | ‡                       |
| SW1710     | -6.101 | -6.238                  |
| JON        | -5.972 | -5.926                  |
| MGH-U3     | -5.965 | -6.033                  |
| HT1197     | -5.949 | -5.245                  |
| CRL2742    | -5.893 | -6.135                  |
| UMUC2      | -5.781 | -6.425                  |
| 253J-P     | -5.727 | -6.320                  |
| SLT4       | -5.676 | -6.273                  |
| T24        | -5.656 | -5.610                  |
| HTB9       | -5.645 | -5.946                  |
| 253JLaval  | -5.597 | -5.722                  |
| VMCUB3     | -5.597 | -6.269                  |
| CUBIII     | -5.565 | -6.075                  |
| FL3        | -5.448 | -6.404                  |
| 575A       | -5.418 | -5.634                  |
| UMUC1      | -5.351 | -6.009                  |
| CRL7193    | -5.327 | -6.327                  |
| J82        | -5.269 | -5.648                  |
| PSI        | -5.266 | ‡                       |
| BC16.1     | -5.231 | -5.930                  |
| UMUC9      | -5.180 | -5.751                  |
| KK47       | -4.841 | -6.203                  |
| RT4        | -4.722 | -4.672                  |

\*The BLA-40 cell line panel has been reported before [15].

<sup>†</sup>Reported IC<sub>50</sub> values for NSC-637993 [15] were recalculated using Spline regression and listed here for comparison between the related imidazoacridinones.

<sup>‡</sup>Four of the BLA-40 cell lines were not tested for NSC-637993 in the prior report.

**Table W2.** HFA Results for NSC-637993 (A) and NSC and Paclitaxel (B).

| (A)              |           |                                        |                                                            |                |                 |                 |                      |                        |                        |
|------------------|-----------|----------------------------------------|------------------------------------------------------------|----------------|-----------------|-----------------|----------------------|------------------------|------------------------|
| Tx               | Cell Line | NSC Log <sub>10</sub> IC <sub>50</sub> | SC*                                                        | P <sup>†</sup> | IP <sup>‡</sup> | P <sup>†</sup>  | Overall <sup>§</sup> | Overall P <sup>‡</sup> |                        |
| NSC Alone        | T24T      | -6.60                                  | 62.7                                                       | .005           | 71.6            | .0006           | 61.3                 | <.0001                 |                        |
|                  | FL3       | -6.40                                  | 66.0                                                       | .0002          | 56.6            | <.0001          | 67.2                 | <.0001                 |                        |
|                  | UMUC1     | -6.00                                  | 88.9                                                       | .2             | 54.9            | <.0001          | 71.9                 | .0115                  |                        |
|                  | KK47      | -6.20                                  | 118.0                                                      | .04            | 107.8           | .0002           | 112.8                | .0018                  |                        |
| (B)              |           |                                        |                                                            |                |                 |                 |                      |                        |                        |
| Tx               | Cell Line | NSC Log <sub>10</sub> IC <sub>50</sub> | Paclitaxel Log <sub>10</sub> IC <sub>50</sub> <sup>¶</sup> | SQ*            | P <sup>†</sup>  | IP <sup>‡</sup> | P <sup>†</sup>       | Overall                | Overall P <sup>‡</sup> |
| NSC + Paclitaxel | UMUC6     | -6.28                                  | -8.99                                                      | 12.5           | <.0001          | 27.0            | <.0001               | 19.8                   | <.0001                 |
|                  | HTB9      | -5.94                                  | -8.93                                                      | 20.6           | <.0001          | 8.1             | <.0001               | 14.4                   | .0006                  |
|                  | T24       | -5.61                                  | -7.36                                                      | 62.8           | <.0001          | 28.3            | <.0001               | 45.6                   | <.0001                 |
|                  | KK47      | -6.20                                  | >-7                                                        | 94.3           | .04             | 37.1            | <.0001               | 65.7                   | .02                    |

\*Average percentage of control growth across four replicates at the subcutaneous implantation site.

<sup>†</sup>Two-tailed P value for single-sample t test against the hypothesis that the inhibition was 0%.

<sup>‡</sup>Average percentage of control growth across four replicates at the intraperitoneal implantation site.

<sup>§</sup>Average percentage of control growth across all replicates and sites.

<sup>¶</sup>We have reported *in vitro* sensitivities to paclitaxel across the BLA-40 panel before [16].



**Table W3.** Union of Yeast Strains with Reduced Fitness in C1311 (A) and Benomyl (B) Treatment.

| Symbol | Description                                                                                                                                                                                                                                                              |
|--------|--------------------------------------------------------------------------------------------------------------------------------------------------------------------------------------------------------------------------------------------------------------------------|
| (A)    |                                                                                                                                                                                                                                                                          |
| ACB1   | Acyl-CoA-binding protein, transports newly synthesized acyl-CoA esters from fatty acid synthetase (Fas1p-Fas2p) to acyl-CoA-consuming processes                                                                                                                          |
| ACE2   | Transcription factor that activates expression of early G <sub>1</sub> -specific genes, localizes to daughter cell nuclei after cytokinesis and delays G <sub>1</sub> progression in daughters, localization is regulated by phosphorylation; potential Cdc28p substrate |
| ADO1   | Adenosine kinase, required for the utilization of S-adenosylmethionine (AdoMet); may be involved in recycling adenosine produced through the methyl cycle                                                                                                                |
| AIM22  | Putative lipote-protein ligase, required along with Lip2 and Lip5 for lipoylation of Lat1p and Kgd2p; similar to <i>E. coli</i> LplA; null mutant displays reduced frequency of mitochondrial genome loss                                                                |
| AKR1   | Palmitoyl transferase involved in protein palmitoylation; acts as a negative regulator of pheromone response pathway; required for endocytosis of pheromone receptors; involved in cell shape control; contains ankyrin repeats                                          |
| ALG13  | Catalytic component of UDP-GlcNAc transferase, required for the second step of dolichyl-linked oligosaccharide synthesis; anchored to the ER membrane through interaction with Alg14p; similar to bacterial and human glycosyltransferases                               |
| ARC15  | Subunit of the ARP2/3 complex, which is required for the motility and integrity of cortical actin patches                                                                                                                                                                |
| ARO1   | Pentafunctional arom protein, catalyzes steps 2 through 6 in the biosynthesis of chorismate, which is a precursor to aromatic amino acids                                                                                                                                |
| ARO2   | Bifunctional chorismate synthase and flavin reductase, catalyzes the conversion of 5-enolpyruvylshikimate 3-phosphate (EPSP) to form chorismate, which is a precursor to aromatic amino acids                                                                            |
| BEM2   | Rho GTPase activating protein (RhoGAP) involved in the control of cytoskeleton organization and cellular morphogenesis; required for bud emergence                                                                                                                       |
| BEM4   | Protein involved in establishment of cell polarity and bud emergence; interacts with the Rho1p small GTP-binding protein and with the Rho-type GTPase Cdc42p; involved in maintenance of proper telomere length                                                          |
| BIM1   | Microtubule-binding protein that together with Kar9p makes up the cortical microtubule capture site and delays the exit from mitosis when the spindle is oriented abnormally                                                                                             |
| BUD20  | Protein involved in bud site selection; diploid mutants display a random budding pattern instead of the wild-type bipolar pattern                                                                                                                                        |
| COY1   | Golgi membrane protein with similarity to mammalian CASP; genetic interactions with GOS1 (encoding a Golgi snare protein) suggest a role in Golgi function                                                                                                               |
| CPA1   | Small subunit of carbamoyl phosphate synthetase, which catalyzes a step in the synthesis of citrulline, an arginine precursor; translationally regulated by an attenuator peptide encoded by YOR302W within the CPA1 mRNA 5'-leader                                      |
| CSR1   | Phosphatidylinositol transfer protein with a potential role in regulating lipid and fatty acid metabolism under heme-depleted conditions; interacts specifically with thioredoxin peroxidase; may have a role in oxidative stress resistance                             |
| CTF4   | Chromatin-associated protein, required for sister chromatid cohesion; interacts with DNA polymerase $\alpha$ (Pol1p) and may link DNA synthesis to sister chromatid cohesion                                                                                             |
| CYB5   | Cytochrome b5, involved in the sterol and lipid biosynthesis pathways; acts as an electron donor to support sterol C5-6 desaturation                                                                                                                                     |
| DYN1   | Cytoplasmic heavy chain dynein, microtubule motor protein, required for anaphase spindle elongation; involved in spindle assembly, chromosome movement, and spindle orientation during cell division, targeted to microtubule tips by Pac1p                              |
| ERG2   | C-8 sterol isomerase, catalyzes the isomerization of the delta-8 double bond to the delta-7 position at an intermediate step in ergosterol biosynthesis                                                                                                                  |
| ERG25  | C-4 methyl sterol oxidase, catalyzes the first of three steps required to remove two C-4 methyl groups from an intermediate in ergosterol biosynthesis; mutants accumulate the sterol intermediate 4,4-dimethylzymosterol                                                |
| ERG28  | Endoplasmic reticulum membrane protein, may facilitate protein-protein interactions between the Erg26p dehydrogenase and the Erg27p 3-ketoreductase and/or tether these enzymes to the ER, also interacts with Erg6p                                                     |
| ERG3   | C-5 sterol desaturase, catalyzes the introduction of a C-5(6) double bond into episterol, a precursor in ergosterol biosynthesis; mutants are viable, but cannot grow on nonfermentable carbon sources                                                                   |
| ERG6   | Delta(24)-sterol C-methyltransferase, converts zymosterol to fecosterol in the ergosterol biosynthetic pathway by methylating position C-24; localized to both lipid particles and mitochondrial outer membrane                                                          |
| FEN2   | Plasma membrane H <sup>+</sup> -pantothenate symporter; confers sensitivity to the antifungal agent fenpropimorph                                                                                                                                                        |
| GCR2   | Transcriptional activator of genes involved in glycolysis; interacts and functions with the DNA-binding protein Gcr1p                                                                                                                                                    |
| GET2   | Subunit of the GET complex; involved in insertion of proteins into the ER membrane; required for the retrieval of HDEL proteins from the Golgi to the ER in an ERD2 dependent fashion and for meiotic nuclear division                                                   |
| GLO4   | Mitochondrial glyoxalase II, catalyzes the hydrolysis of S-D-lactoylglutathione into glutathione and D-lactate                                                                                                                                                           |
| GTR2   | Putative GTP binding protein that negatively regulates Ran/Tc4 GTPase cycle; activates transcription; subunit of EGO and GSE complexes; required for sorting of Gap1p; localizes to cytoplasm and to chromatin; homolog of human RagC and RagD                           |
| ISC1   | Mitochondrial membrane localized inositol phosphosphingolipid phospholipase C, hydrolyzes complex sphingolipids to produce ceramide; activated by phosphatidylserine, cardiolipin, and phosphatidylglycerol; mediates Na <sup>+</sup> and Li <sup>+</sup> halotolerance  |
| MGA2   | ER membrane protein involved in regulation of OLE1 transcription, acts with homolog Spt23p; inactive ER form dimerizes and one subunit is then activated by ubiquitin/proteasome-dependent processing followed by nuclear targeting                                      |
| MGM1   | Mitochondrial GTPase related to dynamin, present in a complex containing Ugo1p and Fzo1p; required for normal morphology of cristae and for stability of Tim11p; homolog of human OPA1 involved in autosomal dominant optic atrophy                                      |
| MNN11  | Subunit of a Golgi mannosyltransferase complex that also contains Anp1p, Mnn9p, Mnn10p, and Hoc1p, and mediates elongation of the polysaccharide mannan backbone; has homology to Mnn10p                                                                                 |
| MNN9   | Subunit of Golgi mannosyltransferase complex also containing Anp1p, Mnn10p, Mnn11p, and Hoc1p that mediates elongation of the polysaccharide mannan backbone; forms a separate complex with Van1p that is also involved in backbone elongation                           |
| MRPL16 | Mitochondrial ribosomal protein of the large subunit                                                                                                                                                                                                                     |
| MSF1   | Mitochondrial phenylalanyl-tRNA synthetase, active as a monomer, unlike the cytoplasmic subunit which is active as a dimer complexed to a $\beta$ -subunit dimer; similar to the $\alpha$ subunit of <i>E. coli</i> phenylalanyl-tRNA synthetase                         |
| NPT1   | Nicotinate phosphoribosyltransferase, acts in the salvage pathway of NAD <sup>+</sup> biosynthesis; required for silencing at rDNA and telomeres and has a role in silencing at mating-type loci; localized to the nucleus                                               |
| PDX3   | Pyridoxine (pyridoxamine) phosphate oxidase, has homologs in <i>E. coli</i> and <i>Myxococcus xanthus</i> ; transcription is under the general control of nitrogen metabolism                                                                                            |
| PER1   | Protein of the endoplasmic reticulum, required for GPI-phospholipase A2 activity that remodels the GPI anchor as a prerequisite for association of GPI-anchored proteins with lipid rafts; functionally complemented by human ortholog PERLD1                            |
| PFY1   | Profilin, actin- and phosphatidylinositol 4,5-bisphosphate-binding protein, involved in cytoskeleton organization, required for normal timing of actin polymerization in response to thermal stress; localizes to plasma membrane and cytosol                            |
| PGA1   | Essential component of GPI-mannosyltransferase II, responsible for second mannose addition to GPI precursors as a partner of Gpi18p; required for maturation of Gas1p and Pho8p; has synthetic genetic interactions with secretory pathway genes                         |
| PIB2   | Protein binding phosphatidylinositol 3-phosphate, involved in telomere-proximal repression of gene expression; similar to Fab1 and Vps27                                                                                                                                 |
| PPM1   | Carboxyl methyltransferase, methylates the C-terminus of the protein phosphatase 2A catalytic subunit (Pph21p or Pph22p), which is important for complex formation with regulatory subunits                                                                              |
| PRO1   | $\gamma$ -Glutamyl kinase, catalyzes the first step in proline biosynthesis                                                                                                                                                                                              |
| RAD51  | Strand exchange protein, forms a helical filament with DNA that searches for homology; involved in the recombinational repair of double-strand breaks in DNA during vegetative growth and meiosis; homolog of Dmc1p and bacterial RecA protein                           |

Table W3. (continued)

| Symbol    | Description                                                                                                                                                                                                                                                                                                                                                                                                                                                       |
|-----------|-------------------------------------------------------------------------------------------------------------------------------------------------------------------------------------------------------------------------------------------------------------------------------------------------------------------------------------------------------------------------------------------------------------------------------------------------------------------|
| RAD55     | Protein that stimulates strand exchange by stabilizing the binding of Rad51p to single-stranded DNA; involved in the recombinational repair of double-strand breaks in DNA during vegetative growth and meiosis; forms heterodimer with Rad57p                                                                                                                                                                                                                    |
| RAX2      | N-glycosylated protein involved in the maintenance of bud site selection during bipolar budding; localization requires Rax1p; RAX2 mRNA stability is regulated by Mpt5p                                                                                                                                                                                                                                                                                           |
| RET2      | Delta subunit of the coatomer complex (COPI), which coats Golgi-derived transport vesicles; involved in retrograde transport between Golgi and ER                                                                                                                                                                                                                                                                                                                 |
| RIM2      | Mitochondrial pyrimidine nucleotide transporter; imports pyrimidine nucleoside triphosphates and exports pyrimidine nucleoside monophosphates; member of the mitochondrial carrier family                                                                                                                                                                                                                                                                         |
| RML2      | Mitochondrial ribosomal protein of the large subunit, has similarity to <i>E. coli</i> L2 ribosomal protein; fat21 mutant allele causes inability to use oleate and may interfere with activity of the Adr1p transcription factor                                                                                                                                                                                                                                 |
| RPA135    | RNA polymerase I subunit A135                                                                                                                                                                                                                                                                                                                                                                                                                                     |
| RPB4      | RNA polymerase II subunit B32; forms two subunit dissociable complex with Rpb7p; involved recruitment of 3'-end processing factors to transcribing RNA polymerase II complex and in export of mRNA to cytoplasm under stress conditions                                                                                                                                                                                                                           |
| RPD3      | Histone deacetylase; regulates transcription and silencing; plays a role in regulating Ty1 transposition                                                                                                                                                                                                                                                                                                                                                          |
| RPL13B    | Protein component of the large (60S) ribosomal subunit, nearly identical to Rpl13Ap; not essential for viability; has similarity to rat L13 ribosomal protein                                                                                                                                                                                                                                                                                                     |
| RPL1A     | N-terminally acetylated protein component of the large (60S) ribosomal subunit, nearly identical to Rpl1Bp and has similarity to <i>E. coli</i> L1 and rat L10a ribosomal proteins; rpl1a rpl1b double null mutation is lethal /// N-terminally acetylated protein component of the large (60S) ribosomal subunit, nearly identical to Rpl1Ap and has similarity to <i>E. coli</i> L1 and rat L10a ribosomal proteins; rpl1a rpl1b double null mutation is lethal |
| RPL2B     | Protein component of the large (60S) ribosomal subunit, identical to Rpl2Ap and has similarity to <i>E. coli</i> L2 and rat L8 ribosomal proteins; expression is upregulated at low temperatures                                                                                                                                                                                                                                                                  |
| RPL35A    | Protein component of the large (60S) ribosomal subunit, identical to Rpl35Bp and has similarity to rat L35 ribosomal protein /// Protein component of the large (60S) ribosomal subunit, identical to Rpl35Ap and has similarity to rat L35 ribosomal protein                                                                                                                                                                                                     |
| RPL39     | Protein component of the large (60S) ribosomal subunit, has similarity to rat L39 ribosomal protein; required for ribosome biogenesis; loss of both Rpl31p and Rpl39p confers lethality; also exhibits genetic interactions with SIS1 and PAB1                                                                                                                                                                                                                    |
| RPS14A    | Ribosomal protein 59 of the small subunit, required for ribosome assembly and 20S pre-rRNA processing; mutations confer cryptopleurine resistance; nearly identical to Rps14Bp and similar to <i>E. coli</i> S11 and rat S14 ribosomal proteins                                                                                                                                                                                                                   |
| RPS1B     | Ribosomal protein 10 (rp10) of the small (40S) subunit; nearly identical to Rps1Ap and has similarity to rat S3a ribosomal protein                                                                                                                                                                                                                                                                                                                                |
| RPS25A    | Protein component of the small (40S) ribosomal subunit; nearly identical to Rps25Bp and has similarity to rat S25 ribosomal protein                                                                                                                                                                                                                                                                                                                               |
| RSB1      | Suppressor of sphingoid long chain base (LCB) sensitivity of an LCB-lyase mutation; putative integral membrane transporter or flippase that may transport LCBs from the cytoplasmic side toward the extracytoplasmic side of the membrane                                                                                                                                                                                                                         |
| SAC1      | Phosphatidylinositol phosphate (PtdInsP) phosphatase involved in hydrolysis of PtdIns[4]P; transmembrane protein localizes to ER and Golgi; involved in protein trafficking and processing, secretion, and cell wall maintenance                                                                                                                                                                                                                                  |
| SEC59     | Dolichol kinase, catalyzes the terminal step in dolichyl monophosphate (Dol-P) biosynthesis; required for viability and for normal rates of lipid intermediate synthesis and protein N-glycosylation                                                                                                                                                                                                                                                              |
| SGO1      | Component of the spindle checkpoint, involved in sensing lack of tension on mitotic chromosomes; protects centromeric Rec8p at meiosis I; required for accurate chromosomal segregation at meiosis II and for mitotic chromosome stability                                                                                                                                                                                                                        |
| SGS1      | Nucleolar DNA helicase of the RecQ family involved in genome integrity maintenance; regulates chromosome synapsis and meiotic joint molecule/crossover formation; similar to human BLM and WRN proteins implicated in Bloom and Werner syndromes                                                                                                                                                                                                                  |
| SMC3      | Subunit of the multiprotein cohesin complex required for sister chromatid cohesion in mitotic cells; also required, with Rec8p, for cohesion and recombination during meiosis; phylogenetically conserved SMC chromosomal ATPase family member                                                                                                                                                                                                                    |
| SNF1      | AMP-activated serine/threonine protein kinase found in a complex containing Snf4p and members of the Sip1p/Sip2p/Gal83p family; required for transcription of glucose-repressed genes, thermotolerance, sporulation, and peroxisome biogenesis                                                                                                                                                                                                                    |
| SOK2      | Nuclear protein that plays a regulatory role in the cyclic AMP (cAMP)-dependent protein kinase (PKA) signal transduction pathway; negatively regulates pseudohyphal differentiation; homologous to several transcription factors                                                                                                                                                                                                                                  |
| SOV1      | Mitochondrial protein of unknown function                                                                                                                                                                                                                                                                                                                                                                                                                         |
| SPO7      | Putative regulatory subunit of Nem1p-Spo7p phosphatase holoenzyme, regulates nuclear growth by controlling phospholipid biosynthesis, required for normal nuclear envelope morphology, premeiotic replication, and sporulation                                                                                                                                                                                                                                    |
| SPT14     | UDP-GlcNAc-binding and catalytic subunit of the enzyme that mediates the first step in glycosylphosphatidylinositol (GPI) biosynthesis, mutations cause defects in transcription and in biogenesis of cell wall proteins                                                                                                                                                                                                                                          |
| SSQ1      | Mitochondrial hsp70-type molecular chaperone, required for assembly of iron/sulfur clusters into proteins at a step after cluster synthesis, and for maturation of Yfh1p, which is a homolog of human frataxin implicated in Friedreich's ataxia                                                                                                                                                                                                                  |
| SUR4      | Elongase, involved in fatty acid and sphingolipid biosynthesis; synthesizes very long chain 20-26-carbon fatty acids from C18-CoA primers; involved in regulation of sphingolipid biosynthesis                                                                                                                                                                                                                                                                    |
| TBF1      | Telobox-containing general regulatory factor; binds to TTAGGG repeats within subtelomeric anti-silencing regions (STARs) and possibly throughout the genome and mediates their insulating capacity by blocking silent chromatin propagation                                                                                                                                                                                                                       |
| TIP20     | Peripheral membrane protein required for fusion of COPI vesicles with the ER, prohibits back fusion of COPII vesicles with the ER, may act as a sensor for vesicles at the ER membrane; interacts with Sec20p                                                                                                                                                                                                                                                     |
| TMA23     | Nucleolar protein of unknown function implicated in ribosome biogenesis; TMA23 may be a fungal-specific gene as no homologs have been yet identified in higher eukaryotes                                                                                                                                                                                                                                                                                         |
| TRP3      | Bifunctional enzyme exhibiting both indole-3-glycerol-phosphate synthase and anthranilate synthase activities, forms multifunctional hetero-oligomeric anthranilate synthase:indole-3-glycerol phosphate synthase enzyme complex with Trp2p                                                                                                                                                                                                                       |
| VAC7      | Integral vacuolar membrane protein involved in vacuole inheritance and morphology; activates Fab1p kinase activity under basal conditions and also after hyperosmotic shock                                                                                                                                                                                                                                                                                       |
| VPS65     | Protein coding                                                                                                                                                                                                                                                                                                                                                                                                                                                    |
| VPS8      | Membrane-associated protein that interacts with Vps21p to facilitate soluble vacuolar protein localization; component of the CORVET complex; required for localization and trafficking of the CPY sorting receptor; contains RING finger motif                                                                                                                                                                                                                    |
| YIP1      | Integral membrane protein required for the biogenesis of ER-derived COPII transport vesicles; interacts with Yif1p and Yos1p; localizes to the Golgi, the ER, and COPII vesicles                                                                                                                                                                                                                                                                                  |
| YML012C-A | Hypothetical ORF                                                                                                                                                                                                                                                                                                                                                                                                                                                  |
| YMR290W-A | Protein required for cell viability                                                                                                                                                                                                                                                                                                                                                                                                                               |
| YOR199W   | Hypothetical ORF                                                                                                                                                                                                                                                                                                                                                                                                                                                  |
| YPL080C   | Hypothetical ORF                                                                                                                                                                                                                                                                                                                                                                                                                                                  |
| YIL014C-A | Putative protein of unknown function                                                                                                                                                                                                                                                                                                                                                                                                                              |
| YBR056W   | Putative cytoplasmic protein of unknown function                                                                                                                                                                                                                                                                                                                                                                                                                  |
| YBR221W-A | Putative protein of unknown function; identified by expression profiling and mass spectrometry                                                                                                                                                                                                                                                                                                                                                                    |
| YDL118W   | Nonessential protein of unconfirmed function; mutants are defective in telomere maintenance, and are synthetically sick or lethal with $\alpha$ -synuclein                                                                                                                                                                                                                                                                                                        |
| YDL119C   | Putative mitochondrial transport protein; GFP fusion protein is induced in response to the DNA-damaging agent MMS; the authentic, nontagged protein is detected in purified mitochondria                                                                                                                                                                                                                                                                          |

Table W3. (continued)

| Symbol    | Description                                                                                                                                                                                                                                                 |
|-----------|-------------------------------------------------------------------------------------------------------------------------------------------------------------------------------------------------------------------------------------------------------------|
| (B)       |                                                                                                                                                                                                                                                             |
| ABD1      | Methyltransferase, catalyzes the transfer of a methyl group from <i>S</i> -adenosylmethionine to the GpppN terminus of capped mRNA                                                                                                                          |
| AKR1      | Palmitoyl transferase involved in protein palmitoylation; acts as a negative regulator of pheromone response pathway; required for endocytosis of pheromone receptors; involved in cell shape control; contains ankyrin repeats                             |
| ARP6      | Actin-related protein that binds nucleosomes; a component of the SWR1 complex, which exchanges histone variant H2AZ (Htz1p) for chromatin-bound histone H2A                                                                                                 |
| BLM10     | Proteasome activator subunit; found in association with core particles, with and without the 19S regulatory particle; required for resistance to bleomycin, may be involved in protecting against oxidative damage; similar to mammalian PA200              |
| BUB3      | Kinetochore checkpoint WD40 repeat protein that localizes to kinetochores during prophase and metaphase, delays anaphase in the presence of unattached kinetochores; forms complexes with Mad1p-Bub1p and with Cdc20p, binds Mad2p and Mad3p                |
| CIN1      | Tubulin folding factor D involved in $\beta$ -tubulin (Tub2p) folding; isolated as mutant with increased chromosome loss and sensitivity to benomyl                                                                                                         |
| CIN2      | GTPase-activating protein (GAP) for Cin4p; tubulin folding factor C involved in $\beta$ -tubulin (Tub2p) folding; mutants display increased chromosome loss and benomyl sensitivity; deletion complemented by human GAP, retinitis pigmentosa 2             |
| CIN4      | GTP-binding protein involved in $\beta$ -tubulin (Tub2p) folding; isolated as mutant with increased chromosome loss and sensitivity to benomyl; regulated by the GTPase-activating protein, Cin2p, the human retinitis pigmentosa 2 (RP2) homolog           |
| CMC1      | Evolutionarily conserved copper-binding protein of the mitochondrial intermembrane space, may be involved in delivering copper from the matrix to the cytochrome <i>c</i> oxidase complex; contains a twin CX9C motif                                       |
| DAL82     | Positive regulator of alphanate-inducible genes; binds a dodecanucleotide sequence upstream of all genes that are induced by alphanate; contains an UISALL DNA-binding, a transcriptional activation, and a coiled-coil domain                              |
| ECM23     | Nonessential protein of unconfirmed function; affects pre-rRNA processing, may act as a negative regulator of the transcription of genes involved in pseudohyphal growth; homologous to Srd1p                                                               |
| ERG2      | C-8 sterol isomerase, catalyzes the isomerization of the delta-8 double bond to the delta-7 position at an intermediate step in ergosterol biosynthesis                                                                                                     |
| GIM3      | Subunit of the heterohexameric cochaperone prefoldin complex which binds specifically to cytosolic chaperonin and transfers target proteins to it                                                                                                           |
| GIM4      | Subunit of the heterohexameric cochaperone prefoldin complex which binds specifically to cytosolic chaperonin and transfers target proteins to it                                                                                                           |
| GND1      | 6-Phosphogluconate dehydrogenase (decarboxylating), catalyzes an NADPH regenerating reaction in the pentose phosphate pathway; required for growth on D-glucono-delta-lactone and adaptation to oxidative stress                                            |
| MGR3      | Subunit of the mitochondrial (mt) <i>i</i> -AAA protease supercomplex, which degrades misfolded mitochondrial proteins; forms a subcomplex with Mgr1p that binds to substrates to facilitate proteolysis; required for growth of cells lacking mtDNA        |
| MTQ2      | <i>S</i> -adenosylmethionine-dependent methyltransferase of the seven $\beta$ -strand family; subunit of complex with Trm112p that methylates translation release factor Sup45p (eRF1) in the ternary complex eRF1-eRF3-GTP; similar to <i>E. coli</i> PpmC |
| PAC10     | Part of the heteromeric co-chaperone GimC/prefoldin complex, which promotes efficient protein folding                                                                                                                                                       |
| PAC2      | Microtubule effector required for tubulin heterodimer formation, binds $\alpha$ -tubulin, required for normal microtubule function, null mutant exhibits cold-sensitive microtubules and sensitivity to benomyl                                             |
| PFD1      | Subunit of heterohexameric prefoldin, which binds cytosolic chaperonin and transfers target proteins to it; involved in the biogenesis of actin and of $\alpha$ - and $\gamma$ -tubulin                                                                     |
| RVS161    | Amphiphysin-like lipid raft protein; interacts with Rvs167p and regulates polarization of the actin cytoskeleton, endocytosis, cell polarity, cell fusion and viability following starvation or osmotic stress                                              |
| SET6      | SET domain protein of unknown function; deletion heterozygote is sensitive to compounds that target ergosterol biosynthesis, may be involved in compound availability                                                                                       |
| STB5      | Transcription factor, involved in regulating multidrug resistance and oxidative stress response; forms a heterodimer with Pdr1p; contains a Zn(II)2Cys6 zinc finger domain that interacts with a pleiotropic drug resistance element <i>in vitro</i>        |
| SWR1      | Swi2/Snf2-related ATPase that is the structural component of the SWR1 complex, which exchanges histone variant H2AZ (Htz1p) for chromatin-bound histone H2A                                                                                                 |
| TIF1      | translation initiation factor eIF4E, 4F complex subunit (PMID 8955119)                                                                                                                                                                                      |
| TUB3      | Alpha-tubulin; associates with $\beta$ -tubulin (Tub2p) to form tubulin dimer, which polymerizes to form microtubules; expressed at lower level than Tub1p                                                                                                  |
| UGO1      | Protein of unknown function; outer membrane component of the mitochondrial fusion machinery; Ugo1p bind directly to Fzo1p and Mgm1p and thereby link these two GTPases during mitochondrial fusion                                                          |
| VPS53     | Component of the GARP (Golgi-associated retrograde protein) complex, Vps51p-Vps52p-Vps53p-Vps54p, which is required for the recycling of proteins from endosomes to the late Golgi; required for vacuolar protein sorting                                   |
| VPS71     | Nucleosome-binding component of the SWR1 complex, which exchanges histone variant H2AZ (Htz1p) for chromatin-bound histone H2A; required for vacuolar protein sorting                                                                                       |
| VPS72     | Htz1p-binding component of the SWR1 complex, which exchanges histone variant H2AZ (Htz1p) for chromatin-bound histone H2A; required for vacuolar protein sorting                                                                                            |
| YAF9      | Subunit of both the NuA4 histone H4 acetyltransferase complex and the SWR1 complex, may function to antagonize silencing near telomeres; interacts directly with Swc4p, has homology to human leukemogenic protein AF9, contains a YEATS domain             |
| YKE2      | Subunit of the heterohexameric Gim/prefoldin protein complex involved in the folding of $\alpha$ -tubulin, $\beta$ -tubulin, and actin                                                                                                                      |
| YLR269C   | Hypothetical ORF                                                                                                                                                                                                                                            |
| YML094C-A | Hypothetical ORF                                                                                                                                                                                                                                            |

**Table W4.** C1311 IC<sub>50</sub>-Correlated Microarray Probes.

| Probe Set*  | Rho <sup>†</sup> | Symbol            | Gene Title                                                                   | Entrez Gene ID | Cytoband              |
|-------------|------------------|-------------------|------------------------------------------------------------------------------|----------------|-----------------------|
| 200661_at   | 0.4553           | <i>CTSA</i>       | cathepsin A                                                                  | 5476           | 20q13.1               |
| 200677_at   | 0.4239           | <i>PTTG1IP</i>    | pituitary tumor-transforming 1 interacting protein                           | 754            | 21q22.3               |
| 200696_s_at | 0.5067           | <i>GSN</i>        | gelsolin (amyloidosis, Finnish type)                                         | 2934           | 9q33                  |
| 200827_at   | 0.4218           | <i>PLOD1</i>      | procollagen-lysine 1, 2-oxoglutarate 5-dioxygenase 1                         | 5351           | 1p36.22               |
| 201021_s_at | 0.4644           | <i>DSTN</i>       | destrin (actin depolymerizing factor)                                        | 11034          | 20p12.1               |
| 201022_s_at | 0.434            | <i>DSTN</i>       | destrin (actin depolymerizing factor)                                        | 11034          | 20p12.1               |
| 201032_at   | 0.4325           | <i>BLCAP</i>      | bladder cancer associated protein                                            | 10904          | 20q11.2-q12           |
| 201038_s_at | -0.4044          | <i>ANP32A</i>     | acidic (leucine-rich) nuclear phosphoprotein 32 family, member A             | 8125           | 15q22.3-q23           |
| 201051_at   | -0.4105          | <i>ANP32A</i>     | acidic (leucine-rich) nuclear phosphoprotein 32 family, member A             | 8125           | 15q22.3-q23           |
| 201148_s_at | 0.4094           | <i>TIMP3</i>      | TIMP metalloproteinase inhibitor 3                                           | 7078           | 22q12.1-q13.2 22q12.3 |
| 201204_s_at | 0.4182           | <i>RRBP1</i>      | ribosome binding protein 1 homolog 180 kDa (dog)                             | 6238           | 20p12                 |
| 201305_x_at | -0.4189          | <i>ANP32B</i>     | acidic (leucine-rich) nuclear phosphoprotein 32 family, member B             | 10541          | 9q22.32               |
| 201481_s_at | 0.405            | <i>PYGB</i>       | phosphorylase, glycogen; brain                                               | 5834           | 20p11.2-p11.1         |
| 201500_s_at | 0.4222           | <i>PPP1R11</i>    | protein phosphatase 1, regulatory (inhibitor) subunit 11                     | 6992           | 6p21.3                |
| 201525_at   | 0.475            | <i>APOD</i>       | apolipoprotein D                                                             | 347            | 3q26.2-qtter          |
| 201618_x_at | 0.4073           | <i>GPAA1</i>      | glycosylphosphatidylinositol anchor attachment protein 1 homolog (yeast)     | 8733           | 8q24.3                |
| 201629_s_at | -0.4001          | <i>ACPI</i>       | acid phosphatase 1, soluble                                                  | 52             | 2p25                  |
| 201720_s_at | -0.4154          | <i>LAPTM5</i>     | lysosomal protein transmembrane 5                                            | 7805           | 1p34                  |
| 201775_s_at | 0.4114           | <i>KIAA0494</i>   | KIAA0494                                                                     | 9813           | 1pter-p22.1           |
| 201987_at   | -0.4256          | <i>MED13</i>      | mediator complex subunit 13                                                  | 9969           | 17q22-q23             |
| 202027_at   | 0.4175           | <i>TMEM184B</i>   | transmembrane protein 184B                                                   | 25829          | 22q12                 |
| 202058_s_at | 0.4398           | <i>KPNA1</i>      | karyopherin $\alpha$ 1 (importin $\alpha$ 5)                                 | 3836           | 3q21                  |
| 202066_at   | 0.4728           | <i>PPF1A1</i>     | PTPRF interacting protein, $\alpha$ 1                                        | 8500           | 11q13.3               |
| 202219_at   | 0.4223           | <i>SLC6A8</i>     | solute carrier family 6, member 8                                            | 6535           | Xq28                  |
| 202421_at   | 0.4328           | <i>IGSF3</i>      | immunoglobulin superfamily, member 3                                         | 3321           | 1p13                  |
| 202478_at   | 0.4103           | <i>TRIB2</i>      | tribbles homolog 2 ( <i>Drosophila</i> )                                     | 28951          | 2p24.3                |
| 202479_s_at | 0.5655           | <i>TRIB2</i>      | tribbles homolog 2 ( <i>Drosophila</i> )                                     | 28951          | 2p24.3                |
| 202503_s_at | -0.4017          | <i>KIAA0101</i>   | KIAA0101                                                                     | 9768           | 15q22.31              |
| 202609_at   | 0.4414           | <i>EPS8</i>       | epidermal growth factor receptor pathway substrate 8                         | 2059           | 12q13                 |
| 202629_at   | -0.457           | <i>APPBP2</i>     | amyloid $\beta$ -precursor protein (cytoplasmic tail) binding protein 2      | 10513          | 17q21-q23             |
| 202818_s_at | 0.4258           | <i>TCEB3</i>      | transcription elongation factor B (SIII), polypeptide 3 (110 kDa, elongin A) | 6924           | 1p36.1                |
| 202821_s_at | 0.4163           | <i>LPP</i>        | LIM domain containing preferred translocation partner in lipoma              | 4026           | 3q28                  |
| 202840_at   | -0.5074          | <i>TAF15</i>      | TAF15 RNA polymerase II, TATA box binding protein (TBP)-associated factor    | 8148           | 17q11.1-q11.2         |
| 202853_s_at | 0.4478           | <i>RYK</i>        | RYK receptor-like tyrosine kinase                                            | 6259           | 3q22                  |
| 202894_at   | 0.4577           | <i>EPHB4</i>      | EPH receptor B4                                                              | 2050           | 7q22                  |
| 202943_s_at | 0.4066           | <i>NAGA</i>       | N-acetylgalactosaminidase, $\alpha$ -                                        | 4668           | 22q13-qtter 22q11     |
| 202946_s_at | 0.4029           | <i>BTBD3</i>      | BTB (POZ) domain containing 3                                                | 22903          | 20p12.2               |
| 203054_s_at | 0.5192           | <i>TCTA</i>       | T-cell leukemia translocation altered gene                                   | 6988           | 3p21                  |
| 203137_at   | -0.4221          | <i>WTAP</i>       | Wilms tumor 1 associated protein                                             | 9589           | 6q25-q27              |
| 203304_at   | 0.4496           | <i>BAMBI</i>      | BMP and activin membrane-bound inhibitor homolog ( <i>Xenopus laevis</i> )   | 25805          | 10p12.3-p11.2         |
| 203455_s_at | 0.4052           | <i>SAT1</i>       | spermidine/spermine N1-acetyltransferase 1                                   | 6303           | Xp22.1                |
| 203488_at   | 0.4243           | <i>LPHN1</i>      | latrophilin 1                                                                | 22859          | 19p13.2               |
| 203657_s_at | 0.4297           | <i>CTSF</i>       | cathepsin F                                                                  | 8722           | 11q13                 |
| 203832_at   | -0.4357          | <i>SNRPF</i>      | small nuclear ribonucleoprotein polypeptide F                                | 6636           | 12q23.1               |
| 204209_at   | 0.4157           | <i>PCYT1A</i>     | phosphate cytidylyltransferase 1, choline, $\alpha$                          | 5130           | 3q29                  |
| 204233_s_at | 0.4287           | <i>CHKA</i>       | choline kinase $\alpha$                                                      | 1119           | 11q13.2               |
| 204266_s_at | 0.4633           | <i>CHKA</i>       | choline kinase $\alpha$                                                      | 1119           | 11q13.2               |
| 204301_at   | -0.4881          | <i>KBTBD11</i>    | kelch repeat and BTB (POZ) domain containing 11                              | 9920           | 8p23.3                |
| 204501_at   | 0.4265           | <i>NOV</i>        | nephroblastoma overexpressed gene                                            | 4856           | 8q24.1                |
| 204528_s_at | -0.4544          | <i>NAP1L1</i>     | nucleosome assembly protein 1-like 1                                         | 4673           | 12q21.2               |
| 204542_at   | 0.4563           | <i>STG6ALNAC2</i> | ST6 -N-acetylgalactosaminide $\alpha$ -2,6-sialyltransferase 2               | 10610          | 17q25.1               |
| 204566_at   | -0.4076          | <i>PPM1D</i>      | protein phosphatase 1D magnesium-dependent, delta isoform                    | 8493           | 17q23.2               |
| 204626_s_at | 0.4075           | <i>ITGB3</i>      | integrin, $\beta_3$ (platelet glycoprotein IIIa, antigen CD61)               | 3690           | 17q21.32              |
| 204638_at   | 0.4635           | <i>ACP5</i>       | acid phosphatase 5, tartrate resistant                                       | 54             | 19p13.3-p13.2         |
| 204653_at   | 0.4107           | <i>TFAP2A</i>     | transcription factor AP-2 $\alpha$                                           | 7020           | 6p24                  |
| 204654_s_at | 0.4418           | <i>TFAP2A</i>     | transcription factor AP-2 $\alpha$                                           | 7020           | 6p24                  |
| 204783_at   | 0.4152           | <i>MLF1</i>       | myeloid leukemia factor 1                                                    | 4291           | 3q25.1                |
| 204789_at   | -0.5508          | <i>FMNL1</i>      | formin-like 1                                                                | 752            | 17q21                 |
| 204803_s_at | -0.4276          | <i>RRAD</i>       | Ras-related associated with diabetes                                         | 6236           | 16q22                 |
| 205209_at   | -0.4004          | <i>ACVR1B</i>     | activin A receptor, type IB                                                  | 91             | 12q13                 |
| 205334_at   | 0.4318           | <i>S100A1</i>     | S100 calcium binding protein A1                                              | 6271           | 1q21                  |
| 205376_at   | 0.4913           | <i>INPP4B</i>     | inositol polyphosphate-4-phosphatase, type II, 105 kDa                       | 8821           | 4q31.21               |
| 205441_at   | 0.4227           | <i>OCELI</i>      | occludin/ELL domain containing 1                                             | 79629          | 19p13.11              |
| 205749_at   | 0.4594           | <i>CYP1A1</i>     | cytochrome P450, family 1, subfamily A, polypeptide 1                        | 1543           | 15q24.1               |
| 206066_s_at | -0.4726          | <i>RAD51C</i>     | RAD51 homolog C ( <i>S. cerevisiae</i> )                                     | 5889           | 17q22-q23             |
| 206077_at   | 0.4308           | <i>KEL</i>        | Kell blood group, metalloendopeptidase                                       | 3792           | 7q33                  |
| 206305_s_at | -0.4283          | <i>C8A</i>        | complement component 8, $\alpha$ polypeptide                                 | 731            | 1p32                  |
| 206523_at   | 0.4377           | <i>CYTH3</i>      | cytohesin 3                                                                  | 9265           | 7p22.1                |
| 206775_at   | 0.4011           | <i>CUBN</i>       | cubilin (intrinsic factor-cobalamin receptor)                                | 8029           | 10p12.31              |
| 206994_at   | 0.4623           | <i>CST4</i>       | cystatin S                                                                   | 1472           | 20p11.21              |
| 207039_at   | 0.4992           | <i>CDKN2A</i>     | cyclin-dependent kinase inhibitor 2A (melanoma, p16, inhibits CDK4)          | 1029           | 9p21                  |
| 207098_s_at | 0.419            | <i>MFN1</i>       | mitofusin 1                                                                  | 55669          | 3q26.33               |
| 207714_s_at | 0.4095           | <i>SERPINH1</i>   | serpin peptidase inhibitor, clade H, member 1                                | 871            | 11q13.5               |
| 207833_s_at | 0.4588           | <i>HLC5</i>       | holocarboxylase synthetase                                                   | 3141           | 21q22.1 21q22.13      |

Table W4. (continued)

| Probe Set*   | Rho <sup>†</sup> | Symbol          | Gene Title                                                        | Entrez Gene ID | Cytoband                  |
|--------------|------------------|-----------------|-------------------------------------------------------------------|----------------|---------------------------|
| 207913_at    | 0.426            | <i>CYP2F1</i>   | cytochrome P450, family 2, subfamily F, polypeptide 1             | 1572           | 19q13.2                   |
| 207938_at    | 0.4719           | <i>PI15</i>     | peptidase inhibitor 15                                            | 51050          | 8q21.11                   |
| 207992_s_at  | -0.407           | <i>AMPD3</i>    | adenosine monophosphate deaminase (isoform E)                     | 272            | 11p15                     |
| 208291_s_at  | -0.4216          | <i>TH</i>       | tyrosine hydroxylase                                              | 7054           | 11p15.5                   |
| 208356_x_at  | -0.4035          | <i>CSH1</i>     | chorionic somatomammotropin hormone 1 (placental lactogen)        | 1442           | 17q24.2                   |
| 208754_s_at  | -0.455           | <i>NAP1L1</i>   | nucleosome assembly protein 1-like 1                              | 4673           | 12q21.2                   |
| 208776_at    | -0.4355          | <i>PSMD11</i>   | proteasome (prosome, macropain) 26S subunit, non-ATPase, 11       | 5717           | 17q11.2                   |
| 208949_s_at  | 0.5056           | <i>LGALS3</i>   | lectin, galactoside-binding, soluble, 3                           | 3958           | 14q21-q22                 |
| 208978_at    | 0.4147           | <i>CRIP2</i>    | cysteine-rich protein 2                                           | 1397           | 14q32.3                   |
| 209054_s_at  | -0.4028          | <i>WHSC1</i>    | Wolf-Hirschhorn syndrome candidate 1                              | 7468           | 4p16.3                    |
| 209280_at    | -0.4334          | <i>MRC2</i>     | mannose receptor, C type 2                                        | 9902           | 17q23.2                   |
| 209361_s_at  | 0.4418           | <i>PCBP4</i>    | poly(rC) binding protein 4                                        | 57060          | 3p21                      |
| 209399_at    | 0.4037           | <i>HLCS</i>     | holocarboxylase synthetase                                        | 3141           | 21q22.1 21q22.13          |
| 209484_s_at  | -0.4026          | <i>NSL1</i>     | NSL1, MIND kinetochore complex component, homolog (S. cerevisiae) | 25936          | 1q41                      |
| 209485_s_at  | 0.4055           | <i>OSBPL1A</i>  | oxysterol binding protein-like 1A                                 | 114876         | 18q11.1                   |
| 209598_at    | -0.4092          | <i>PNMA2</i>    | paraneoplastic antigen MA2                                        | 10687          | 8p21.2                    |
| 209736_at    | 0.4124           | <i>SOX13</i>    | SRY (sex determining region Y)-box 13                             | 9580           | 1q32                      |
| 209744_x_at  | 0.4511           | <i>ITCH</i>     | itchy E3 ubiquitin protein ligase homolog (mouse)                 | 83737          | 20q11.22-q11.23           |
| 209849_s_at  | -0.4522          | <i>RAD51C</i>   | RAD51 homolog C (S. cerevisiae)                                   | 5889           | 17q22-q23                 |
| 209945_s_at  | 0.4391           | <i>GSK3B</i>    | glycogen synthase kinase 3β                                       | 2932           | 3q13.3                    |
| 210083_at    | 0.4181           | <i>SEMA7A</i>   | semaphorin 7A, GPI membrane anchor                                | 8482           | 15q22.3-q23               |
| 210194_at    | -0.5138          | <i>PLA2R1</i>   | phospholipase A2 receptor 1, 180 kDa                              | 22925          | 2q23-q24                  |
| 210235_s_at  | 0.4315           | <i>PTPRF</i>    | PTPRF interacting protein, α 1                                    | 8500           | 11q13.3                   |
| 210285_x_at  | -0.4267          | <i>WTAP</i>     | Wilms tumor 1 associated protein                                  | 9589           | 6q25-q27                  |
| 210740_s_at  | 0.411            | <i>ITPK1</i>    | inositol 1,3,4-triphosphate 5/6 kinase                            | 3705           | 14q31                     |
| 210854_x_at  | 0.4757           | <i>SLC6A8</i>   | solute carrier family 6, member 8                                 | 6535           | Xq28                      |
| 210980_s_at  | 0.4375           | <i>ASAHI</i>    | N-acylsphingosine amidohydrolase 1                                | 427            | 8p22-p21.3                |
| 211381_x_at  | 0.403            | <i>SPAG11B</i>  | sperm associated antigen 11B                                      | 10407          | 8p23-p22                  |
| 211870_s_at  | 0.4171           | <i>PCDHA3</i>   | protocadherin α 3                                                 | 56145          | 5q31                      |
| 211883_x_at* | 0.4335           | <i>CEACAM1</i>  | carcinoembryonic antigen-related cell adhesion molecule 1         | 634            | 19q13.2                   |
| 211988_at    | -0.4108          | <i>SMARCE1</i>  | SWI/SNF related, matrix associated, subfamily e, member 1         | 6605           | 17q21.2                   |
| 212007_at    | -0.4351          | <i>UBXN4</i>    | UBX domain protein 4                                              | 23190          | 2q21.3                    |
| 212056_at    | -0.4018          | <i>KIAA0182</i> | KIAA0182                                                          | 23199          | 16q24.1                   |
| 212086_x_at  | 0.4143           | <i>LMNA</i>     | lamin A/C                                                         | 4000           | 1q21.2-q21.3              |
| 212089_at    | 0.4162           | <i>LMNA</i>     | lamin A/C                                                         | 4000           | 1q21.2-q21.3              |
| 212226_s_at  | 0.4283           | <i>PPAP2B</i>   | phosphatidic acid phosphatase type 2B                             | 8613           | 1pter-p22.1               |
| 212230_at    | 0.4355           | <i>PPAP2B</i>   | phosphatidic acid phosphatase type 2B                             | 8613           | 1pter-p22.1               |
| 212252_at    | -0.4583          | <i>CAMKK2</i>   | calcium/calmodulin-dependent protein kinase kinase 2, β           | 10645          | 12q24.2                   |
| 212338_at    | 0.41             | <i>MYO1D</i>    | myosin 1D                                                         | 4642           | 17q11-q12                 |
| 212375_at    | -0.4327          | <i>EP400</i>    | E1A binding protein p400                                          | 57634          | 12q24.33                  |
| 212631_at    | 0.4084           | <i>STX7</i>     | syntaxin 7                                                        | 8417           | 6q23.1                    |
| 212747_at    | 0.4647           | <i>ANKS1A</i>   | ankyrin repeat and sterile α motif domain containing 1A           | 23294          | 6p21.31                   |
| 212807_s_at  | 0.5102           | <i>SORT1</i>    | sortilin 1                                                        | 6272           | 1p21.3-p13.1 1p21.3-p13.1 |
| 212876_at    | 0.4171           | <i>B4GALT4</i>  | UDP-Gal:βGlcNAc β 1,4- galactosyltransferase, polypeptide 4       | 8702           | 3q13.3                    |
| 212957_s_at  | 0.4444           | <i>LOC92249</i> | hypothetical LOC92249                                             | 92249          | Xq11.1                    |
| 213236_at    | 0.4565           | <i>SASH1</i>    | SAM and SH3 domain containing 1                                   | 23328          | 6q24.3                    |
| 213242_x_at  | 0.4868           | <i>KIAA0284</i> | KIAA0284                                                          | 283638         | 14q32.33                  |
| 213293_s_at  | -0.4534          | <i>TRIM22</i>   | tripartite motif-containing 22                                    | 10346          | 11p15                     |
| 213294_at    | -0.4017          | —               | —                                                                 | —              | —                         |
| 213310_at    | 0.4496           | <i>EIF2C2</i>   | Eukaryotic translation initiation factor 2C, 2                    | 27161          | 8q24                      |
| 213343_s_at  | 0.604            | <i>GDPD5</i>    | glycerophosphodiester phosphodiesterase domain containing 5       | 81544          | 11q13.4-q13.5             |
| 213472_at    | -0.4171          | <i>HNRNPH1</i>  | heterogeneous nuclear ribonucleoprotein H1 (H)                    | 3187           | 5q35.3                    |
| 213575_at    | -0.4166          | <i>TRA2A</i>    | transformer 2 α homolog ( <i>Drosophila</i> )                     | 29896          | 7p15.3                    |
| 213649_at    | -0.4247          | <i>SFRS7</i>    | splicing factor, arginine/serine-rich 7, 35 kDa                   | 6432           | 2p22.1                    |
| 213672_at    | -0.4654          | <i>MARS</i>     | methionyl-tRNA synthetase                                         | 4141           | 12q13.2                   |
| 213702_x_at  | 0.4707           | <i>ASAHI</i>    | N-acylsphingosine amidohydrolase 1                                | 427            | 8p22-p21.3                |
| 213843_x_at  | 0.4967           | <i>SLC6A8</i>   | solute carrier family 6, member 8                                 | 6535           | Xq28                      |
| 213864_s_at  | -0.4207          | <i>NAP1L1</i>   | nucleosome assembly protein 1-like 1                              | 4673           | 12q21.2                   |
| 213902_at    | 0.4116           | <i>ASAHI</i>    | N-acylsphingosine amidohydrolase 1                                | 427            | 8p22-p21.3                |
| 213921_at    | 0.4172           | <i>SST</i>      | somatostatin                                                      | 6750           | 3q28                      |
| 213954_at    | -0.4715          | <i>FAM169A</i>  | family with sequence similarity 169, member A                     | 26049          | 5q13.3                    |
| 214152_at    | 0.4033           | <i>CCPG1</i>    | cell cycle progression 1                                          | 9236           | 15q21.1                   |
| 214172_x_at  | 0.455            | <i>RYK</i>      | RYK receptor-like tyrosine kinase                                 | 6259           | 3q22                      |
| 214180_at    | 0.4349           | <i>MAN1C1</i>   | mannosidase, α, class 1C, member 1                                | 57134          | 1p35                      |
| 214213_x_at  | 0.428            | <i>LMNA</i>     | Lamin A/C                                                         | 4000           | 1q21.2-q21.3              |
| 214280_x_at  | -0.4075          | <i>HNRNPA1</i>  | heterogeneous nuclear ribonucleoprotein A1                        | 3178           | 12q13.1                   |
| 214584_x_at  | 0.444            | <i>ACACB</i>    | acetyl-Coenzyme A carboxylase β                                   | 32             | 12q24.11                  |
| 214635_at    | 0.4365           | <i>CLDN9</i>    | claudin 9                                                         | 9080           | 16p13.3                   |
| 214812_s_at  | -0.5214          | <i>MOBK1B</i>   | MOB1, Mps One Binder kinase activator-like 1B (yeast)             | 55233          | 2p13.1                    |
| 214971_s_at  | 0.4022           | <i>ST6GAL1</i>  | ST6 β-galactosamide α-2,6-sialyltransferase 1                     | 6480           | 3q27-q28                  |
| 215017_s_at  | 0.4167           | <i>FNBP1L</i>   | formin binding protein 1-like                                     | 54874          | 1p22.1                    |
| 215096_s_at  | -0.4088          | <i>ESD</i>      | esterase D/formylglutathione hydrolase                            | 2098           | 13q14.1-q14.2             |
| 215381_at    | 0.4365           | <i>FRAP1</i>    | FK506 binding protein 12-rapamycin associated protein 1           | 2475           | 1p36.2                    |
| 215495_s_at  | 0.4115           | <i>SAMD4A</i>   | sterile α motif domain containing 4A                              | 23034          | 14q22.2                   |



Table W4. (continued)

| Probe Set*   | Rho <sup>†</sup> | Symbol                  | Gene Title                                                                   | Entrez Gene ID | Cytoband                |
|--------------|------------------|-------------------------|------------------------------------------------------------------------------|----------------|-------------------------|
| 215535_s_at  | 0.4043           | <i>AGPAT1</i>           | 1-acylglycerol-3-phosphate O-acyltransferase 1                               | 10554          | 6p21.3                  |
| 215611_at    | -0.4135          | <i>TCF12</i>            | transcription factor 12                                                      | 6938           | 15q21                   |
| 215693_x_at  | 0.4599           | <i>DDX27</i>            | DEAD (Asp-Glu-Ala-Asp) box polypeptide 27                                    | 55661          | 20q13.13                |
| 215731_s_at* | -0.4896          | <i>MPHOSPH9</i>         | M-phase phosphoprotein 9                                                     | 10198          | 12q24.31                |
| 215749_s_at  | 0.4258           | <i>GORASP1</i>          | golgi reassembly stacking protein 1, 65 kDa                                  | 64689          | 3p22-p21.33             |
| 215812_s_at  | 0.5162           | <i>LOC653562</i>        | similar to solute carrier family 6 member 8                                  | —              | 16p11.2 /// Xq28        |
| 216032_s_at  | 0.4316           | <i>ERGIC3</i>           | ERGIC and golgi 3                                                            | 51614          | 20pter-q12              |
| 216060_s_at  | 0.4403           | <i>DAAM1</i>            | dishevelled associated activator of morphogenesis 1                          | 23002          | 14q23.1                 |
| 216086_at    | 0.4003           | <i>SV2C</i>             | synaptic vesicle glycoprotein 2C                                             | 22987          | 5q13.3                  |
| 216560_x_at  | 0.4343           | <i>IGL@</i>             | immunoglobulin lambda locus                                                  | 3535           | 22q11.1-q11.2           |
| 216629_at    | 0.4066           | <i>SRRM2</i>            | Serine/arginine repetitive matrix 2                                          | 23524          | 16p13.3                 |
| 216751_at    | -0.4111          | —                       | —                                                                            | —              | —                       |
| 216835_s_at  | -0.4124          | <i>DOK1</i>             | docking protein 1, 62 kDa (downstream of tyrosine kinase 1)                  | 1796           | 2p13                    |
| 216874_at    | 0.489            | <i>DKFZp686O1327</i>    | Hypothetical gene supported by BC043549; BX648102                            | 401014         | 2q22.3                  |
| 216976_s_at  | 0.4007           | <i>RYK</i>              | RYK receptor-like tyrosine kinase                                            | 6259           | 3q22                    |
| 217036_at    | 0.4367           | <i>LOC100293679</i>     | hypothetical protein LOC100293679                                            | 100293679      | —                       |
| 217094_s_at  | 0.4157           | <i>ITCH</i>             | itchy E3 ubiquitin protein ligase homolog (mouse)                            | 83737          | 20q11.22-q11.23         |
| 217573_at    | 0.4175           | <i>GRIN2C</i>           | glutamate receptor, ionotropic, N-methyl D-aspartate 2C                      | 2905           | 17q25                   |
| 217606_at    | 0.4886           | —                       | —                                                                            | —              | —                       |
| 217613_at    | -0.4542          | <i>TMEM144</i>          | transmembrane protein 144                                                    | 55314          | 4q32.1                  |
| 217730_at*   | 0.4432           | <i>TMBIM1</i>           | transmembrane BAX inhibitor motif containing 1                               | 64114          | 2p24.3-p24.1            |
| 217749_at    | 0.4832           | <i>COPG</i>             | coatomer protein complex, subunit $\gamma$                                   | 22820          | 3q21.3                  |
| 217925_s_at  | 0.4097           | <i>C6orf106</i>         | chromosome 6 open reading frame 106                                          | 64771          | 6p21.31                 |
| 218099_at    | 0.4599           | <i>TEX2</i>             | testis expressed 2                                                           | 55852          | 17q23.3                 |
| 218299_at    | 0.4424           | <i>C1orf24</i>          | chromosome 11 open reading frame 24                                          | 53838          | 11q13                   |
| 218509_at    | 0.5167           | <i>LPPR2</i>            | lipid phosphate phosphatase-related protein type 2                           | 64748          | 19p13.2                 |
| 218670_at    | -0.4554          | <i>PUS1</i>             | pseudouridylyl synthase 1                                                    | 80324          | 12q24.33                |
| 218779_x_at  | 0.4243           | <i>EPS8L1</i>           | EPS8-like 1                                                                  | 54869          | 19q13.42                |
| 218936_s_at  | -0.4272          | <i>CCDC59</i>           | coiled-coil domain containing 59                                             | 29080          | 12q21.31                |
| 218963_s_at  | 0.4383           | <i>KRT23</i>            | keratin 23 (histone deacetylase-inducible)                                   | 25984          | 17q21.2                 |
| 218970_s_at  | -0.4909          | <i>CUTC</i>             | cutC copper transporter homolog ( <i>E. coli</i> )                           | 51076          | 10q24.2                 |
| 219011_at    | 0.4364           | <i>PLEKHA4</i>          | pleckstrin homology domain containing, family A member 4                     | 57664          | 19q13.33                |
| 219046_s_at  | 0.4165           | <i>PKNOX2</i>           | PBX/knotted 1 homeobox 2                                                     | 63876          | —                       |
| 219108_x_at  | 0.4345           | <i>DDX27 /// SS18</i>   | DEAD (Asp-Glu-Ala-Asp) box polypeptide 27                                    | —              | 18q11.2 /// 20q13.13    |
| 219112_at    | -0.4589          | <i>RAPGEF6</i>          | Rap guanine nucleotide exchange factor (GEF) 6                               | 51735          | 5q31.1                  |
| 219143_s_at  | 0.4134           | <i>RPP25</i>            | ribonuclease P/MRP 25 kDa subunit                                            | 54913          | 15q24.2                 |
| 219278_at    | 0.4464           | <i>MAP3K6</i>           | mitogen-activated protein kinase kinase kinase 6                             | 9064           | 1p36.11                 |
| 219394_at    | -0.4245          | <i>PGS1</i>             | phosphatidylglycerophosphate synthase 1                                      | 9489           | 17q25.3                 |
| 219428_s_at  | 0.4054           | <i>PXMP4</i>            | peroxisomal membrane protein 4, 24 kDa                                       | 11264          | 20q11.22                |
| 219450_at    | 0.4348           | <i>C4orf19</i>          | chromosome 4 open reading frame 19                                           | 55286          | 4p14                    |
| 219569_s_at  | -0.4059          | <i>TMEM22</i>           | transmembrane protein 22                                                     | 80723          | 3q22.3                  |
| 219710_at    | 0.4466           | <i>SH3TC2</i>           | SH3 domain and tetratricopeptide repeats 2                                   | 79628          | 5q32                    |
| 219873_at    | 0.4197           | <i>COLEC11</i>          | collectin subfamily member 11                                                | 78989          | 2p25.3                  |
| 220038_at    | 0.4149           | <i>C8orf44 /// SGK3</i> | chromosome 8 open reading frame 44                                           | —              | 8q12.3-q13.1 /// 8q13.1 |
| 220499_at    | 0.443            | <i>FNDC8</i>            | fibronectin type III domain containing 8                                     | 54752          | 17q12                   |
| 220559_at    | 0.4341           | <i>EN1</i>              | engrailed homeobox 1                                                         | 2019           | 2q13-q21                |
| 220948_s_at  | 0.447            | <i>ATP1A1</i>           | ATPase, Na <sup>+</sup> /K <sup>+</sup> transporting, $\alpha$ 1 polypeptide | 476            | 1p21                    |
| 220999_s_at  | -0.4167          | <i>CYFIP2</i>           | cytoplasmic FMR1 interacting protein 2                                       | 26999          | 5q33.3                  |
| 221017_s_at  | 0.409            | <i>LRRC3</i>            | leucine rich repeat containing 3                                             | 81543          | 21q22.3                 |
| 221215_s_at  | 0.4981           | <i>RIPK4</i>            | receptor-interacting serine-threonine kinase 4                               | 54101          | 21q22.3                 |
| 221410_x_at  | 0.4631           | <i>PCDHB3</i>           | protocadherin $\beta$ 3                                                      | 56132          | 5q31                    |
| 221489_s_at  | 0.4378           | <i>SPRY4</i>            | sprouty homolog 4 ( <i>Drosophila</i> )                                      | 81848          | 5q31.3                  |
| 221616_s_at  | -0.4113          | <i>TAF9B</i>            | TAF9B RNA polymerase II                                                      | 51616          | Xq13.1-q21.1            |
| 221681_s_at  | -0.4101          | <i>DSPP</i>             | dentin sialophosphoprotein                                                   | 1834           | 4q21.3                  |
| 221683_s_at  | -0.4697          | <i>CEP290</i>           | centrosomal protein 290 kDa                                                  | 80184          | 12q21.32                |
| 221738_at    | 0.4105           | <i>KIAA1219</i>         | KIAA1219                                                                     | 57148          | 20q11.23                |
| 221816_s_at  | -0.4902          | <i>PHF11</i>            | PHD finger protein 11                                                        | 51131          | 13q14.2                 |
| 221819_at    | -0.4578          | <i>RAB35</i>            | RAB35, member RAS oncogene family                                            | 11021          | 12q24.31                |
| 221821_s_at* | -0.4137          | <i>C12orf41</i>         | chromosome 12 open reading frame 41                                          | 54934          | 12q13.11                |
| 221900_at    | -0.4483          | <i>COL8A2</i>           | collagen, type VIII, $\alpha$ 2                                              | 1296           | 1p34.2                  |
| 221919_at    | -0.4026          | <i>HNRNPA1</i>          | heterogeneous nuclear ribonucleoprotein A1                                   | 3178           | 12q13.1                 |
| 221965_at*   | -0.5905          | <i>MPHOSPH9</i>         | M-phase phosphoprotein 9                                                     | 10198          | 12q24.31                |
| 221986_s_at  | 0.4164           | <i>KLHL24</i>           | kelch-like 24 ( <i>Drosophila</i> )                                          | 54800          | 3q27.1                  |
| 222347_at    | 0.4183           | <i>LOC644450</i>        | hypothetical protein LOC644450                                               | 644450         | 1q12                    |
| 32502_at     | 0.4446           | <i>GDPD5</i>            | glycerophosphodiester phosphodiesterase domain containing 5                  | 81544          | 11q13.4-q13.5           |
| 36888_at     | -0.4388          | <i>HAUS5</i>            | HAUS augmin-like complex, subunit 5                                          | 23354          | 19q13.12                |
| 38918_at     | 0.4097           | <i>SOX13</i>            | SRY (sex determining region Y)-box 13                                        | 9580           | 1q32                    |
| 41644_at     | 0.4485           | <i>SASH1</i>            | SAM and SH3 domain containing 1                                              | 23328          | 6q24.3                  |
| 52164_at     | 0.4047           | <i>C11orf24</i>         | chromosome 11 open reading frame 24                                          | 53838          | 11q13                   |
| 52169_at     | -0.4345          | <i>STRADA</i>           | STE20-related kinase adaptor $\alpha$                                        | 92335          | 17q23.3                 |
| 64899_at     | 0.4262           | <i>LPPR2</i>            | lipid phosphate phosphatase-related protein type 2                           | 64748          | 19p13.2                 |

\*Probe set designation from the Affymetrix HG-U133A platform. The five probes exhibiting concordant expression across all three data sets are specifically asterisked.

<sup>†</sup>Correlation coefficient ( $\rho$ ) for Spearman rank-based correlation of indicated probe expression in the NCI-60 cell line data set, *GSE5720*, to the C1311 IC<sub>50</sub> values for each of the sixty cell lines. A cutoff of 0.4 was used for biomarker discovery.
